# Supplementary material for: Prognostic significance of SPARC expression in non-small cell lung cancer: A meta-analysis and bioinformatics analysis
Source: PubMed Central journal article supplement — Oncol Lett. 2022 Sep 27;24(5):412. doi: 10.3892/ol.2022.13532 (PMC9557165; doi:10.3892/ol.2022.13532), 2022-09-27
Supplement: Supplementary_Data.pdf [file Supplementary_Data.pdf]

Table SI. Copy number variations of immune cells in non-small cell lung cancer.

| A, Lung adenocarcinoma |                    |                       |
|------------------------|--------------------|-----------------------|
| Type of immune cell    | CNA level          | P-value               |
| B cell                 | Deep deletion      | 0.435281638           |
| B cell                 | Arm-level deletion | 0.001181159           |
| B cell                 | Diploid/normal     | 1                     |
| B cell                 | Arm-level gain     | 0.516882202           |
| B cell                 | High amplication   | $6.95 \times 10^{-6}$ |
| CD8+ T cell            | Deep deletion      | 0.224640775           |
| CD8+ T cell            | Arm-level deletion | 0.042860185           |
| CD8+ T cell            | Diploid/normal     | 1                     |
| CD8+ T cell            | Arm-level gain     | 0.002082              |
| CD8+ T cell            | High amplication   | 0.10807474            |
| CD4+ T cell            | Deep deletion      | 0.521130783           |
| CD4+ T cell            | Arm-level deletion | 0.000205873           |
| CD4+ T cell            | Diploid/normal     | 1                     |
| CD4+ T cell            | Arm-level gain     | 0.238851826           |
| CD4+ T cell            | High amplication   | 0.162160859           |
| Macrophage             | Deep deletion      | 0.798331692           |
| Macrophage             | Arm-level deletion | 0.003623419           |
| Macrophage             | Diploid/normal     | 1                     |
| Macrophage             | Arm-level gain     | 0.008307923           |
| Macrophage             | High amplication   | 0.71346368            |
| Neutrophil             | Deep deletion      | 0.98432366            |
| Neutrophil             | Arm-level deletion | 0.00037364            |
| Neutrophil             | Diploid/normal     | 1                     |
| Neutrophil             | Arm-level gain     | 0.004700196           |
| Neutrophil             | High amplication   | 0.306122487           |
| Dendritic cell         | Deep deletion      | 0.679631101           |

| Dendritic cell                  | Arm-level deletion | 1.65x10 <sup>-5</sup> |
|---------------------------------|--------------------|-----------------------|
| Dendritic cell                  | Diploid/normal     | 1                     |
| Dendritic cell                  | Arm-level gain     | 0.542457582           |
| Dendritic cell                  | High amplication   | 0.671808277           |
| B, Lung squamous cell carcinoma |                    |                       |
| Type of immune cell             | CNA level          | P-value               |
| B cell                          | Deep deletion      | 0.08662873            |
| B cell                          | Arm-level deletion | 0.024108808           |
| B cell                          | Diploid/normal     | 1                     |
| B cell                          | Arm-level gain     | 0.533142842           |
| CD8+ T cell                     | Deep deletion      | 0.475370531           |
| CD8+ T cell                     | Arm-level deletion | 0.00051388            |
| CD8+ T cell                     | Diploid/normal     | 1                     |
| CD8+ T cell                     | Arm-level gain     | 0.105189845           |
| CD4+ T cell                     | Deep deletion      | 0.1866275             |
| CD4+ T cell                     | Arm-level deletion | 0.034500601           |
| CD4+ T cell                     | Diploid/normal     | 1                     |
| CD4+ T cell                     | Arm-level gain     | 0.177679715           |
| Macrophage                      | Deep deletion      | 0.793474217           |
| Macrophage                      | Arm-level deletion | 0.279346789           |
| Macrophage                      | Diploid/normal     | 1                     |
| Macrophage                      | Arm-level gain     | 0.649491549           |
| Neutrophil                      | Deep deletion      | 0.311862919           |
| Neutrophil                      | Arm-level deletion | 0.001065056           |
| Neutrophil                      | Diploid/normal     | 1                     |
| Neutrophil                      | Arm-level gain     | 0.225959785           |
| Dendritic cell                  | Deep deletion      | 0.29768738            |
| Dendritic cell                  | Arm-level deletion | 0.000255532           |
| Dendritic cell                  | Diploid/normal     | 1                     |

---

|                |                |             |
|----------------|----------------|-------------|
| Dendritic cell | Arm-level gain | 0.561104127 |
|----------------|----------------|-------------|

---

P-values refer to comparison with Diploid/Normal.CNA, copy-number alteration.
